# Supplementary material for: Reduction of Triple Bond in [B12H11NCR]− Anions by Lithium Aluminum Hydride: A Novel Approach to the Synthesis of N-Monoalkylammonio-Substituted closo-Dodecaborates
Source: MDPI journal article supplement (doi:10.3390/inorganics12010002), 2023-12-20
Supplement: s1 [file s1]

# The reduction of the triple bond in [B<sub>12</sub>H<sub>11</sub>NCR]<sup>–</sup> anions by Lithium Aluminum Hydride: A novel approach to the synthesis of N-monoalkylammonio-substituted *closo*-dodecaborates.

Alexey V. Nelyubin<sup>1</sup>, Nikolay K. Neumolotov<sup>1</sup>, Nikita A. Selivanov<sup>1</sup>, Alexander Yu. Bykov<sup>1</sup>, Ilya N. Klyukin<sup>1</sup>, Alexander S. Novikov<sup>2,3</sup>, Alexey S. Kubasov<sup>1</sup>, Andrey P. Zhdanov<sup>1</sup>, Konstantin Yu. Zhizhin<sup>1</sup>, Nikolay T. Kuznetsov<sup>1</sup>

<sup>1</sup> Kurnakov Institute of General and Inorganic Chemistry, Russian Academy of Sciences, 119991, Leninskii pr. 31, Moscow, Russian Federation;

nelyubin.av@yandex.ru (A.V.N.); neumolotovn@gmail.com (N.K.N.); GooVee@yandex.ru (N.A.S.);

bykov@igic.ras.ru (A.Y.B.); klukinil@igic.ras.ru (I.N.K.); fobosax@mail.ru (K.A.S.); zhdanov@igic.ras.ru (Z.A.P.);

zhizhin@igic.ras.ru (K.Y.Z.); boron@igic.ras.ru (N.T.K.).

<sup>2</sup> Institute of Chemistry, Saint Petersburg State University, Universitetskaya nab. 7-9, 199034, Saint Petersburg, Russian Federation; a.s.novikov@spbu.ru (A.S.N.)

<sup>3</sup> Research Institute of Chemistry, Peoples' Friendship University of Russia (RUDN University), Miklukho-Maklaya st. 6, 117198, Moscow, Russian Federation; novikov-as@rudn.ru (A.S.N.)

Correspondence: zhdanov@igic.ras.ru (ZAP); zhizhin@igic.ras.ru; (KYZ)

## 1. Spectral data for synthesised compounds.

Figure S1:  $^{11}\text{B}\{^1\text{H}\}$  NMR spectrum  $(\text{Bu}_4\text{N})[\text{B}_{12}\text{H}_{11}\text{NH}_2\text{CH}_2\text{CH}_3]$  2a

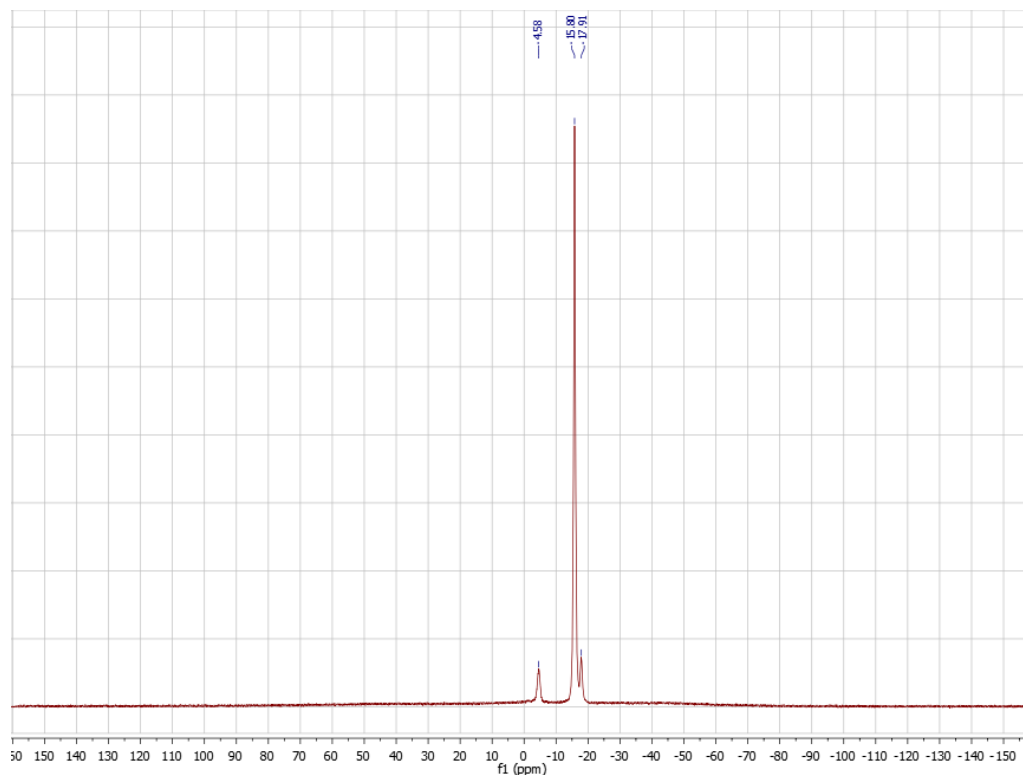

Figure S2:  $^1\text{H}$  NMR spectrum  $(\text{Bu}_4\text{N})[\text{B}_{12}\text{H}_{11}\text{NH}_2\text{CH}_2\text{CH}_3]$  2a

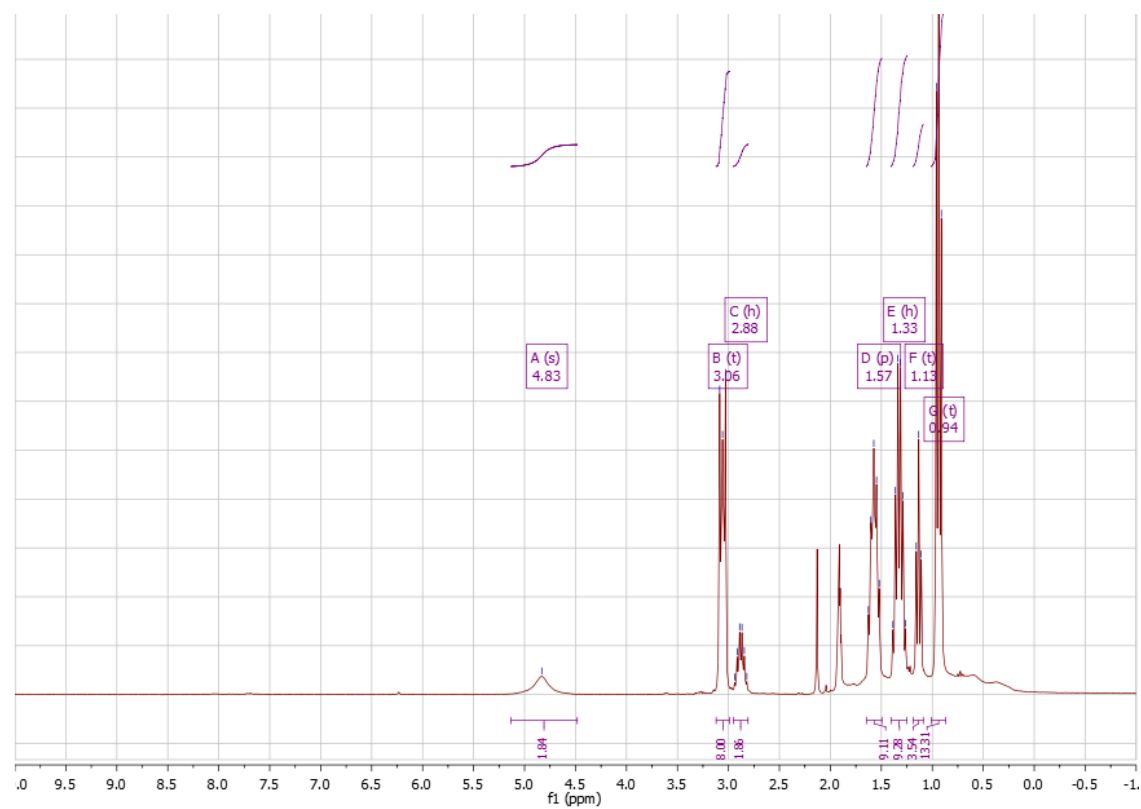

13C NMR spectrum of compound 10 in CD<sub>3</sub>CN. The x-axis is labeled 'f1 (ppm)' and ranges from 210 to -10. The spectrum shows several sharp peaks. A red peak is labeled '117.41 CD<sub>3</sub>CN'. Blue peaks are labeled '58.42', '43.05', '23.42', '19.39', '13.03', and '12.93'. A cluster of peaks near 0 ppm is labeled with values: '0.75 CD<sub>3</sub>CN', '0.47 CD<sub>3</sub>CN', '0.20 CD<sub>3</sub>CN', '0.08', and '0.35'.

Mass spectrum plot showing relative intensity (0.0 to 1.5) versus m/z (125.0 to 375.0). The base peak is at m/z 186.2650. Other labeled peaks include 141.2088, 154.9782, and 172.2029.

Figure S5:  $^{11}\text{B}\{^1\text{H}\}$  NMR spectrum  $(\text{Bu}_4\text{N})[\text{B}_{12}\text{H}_{11}\text{NH}_2\text{CH}_2\text{CH}_2\text{CH}_3]$  2b

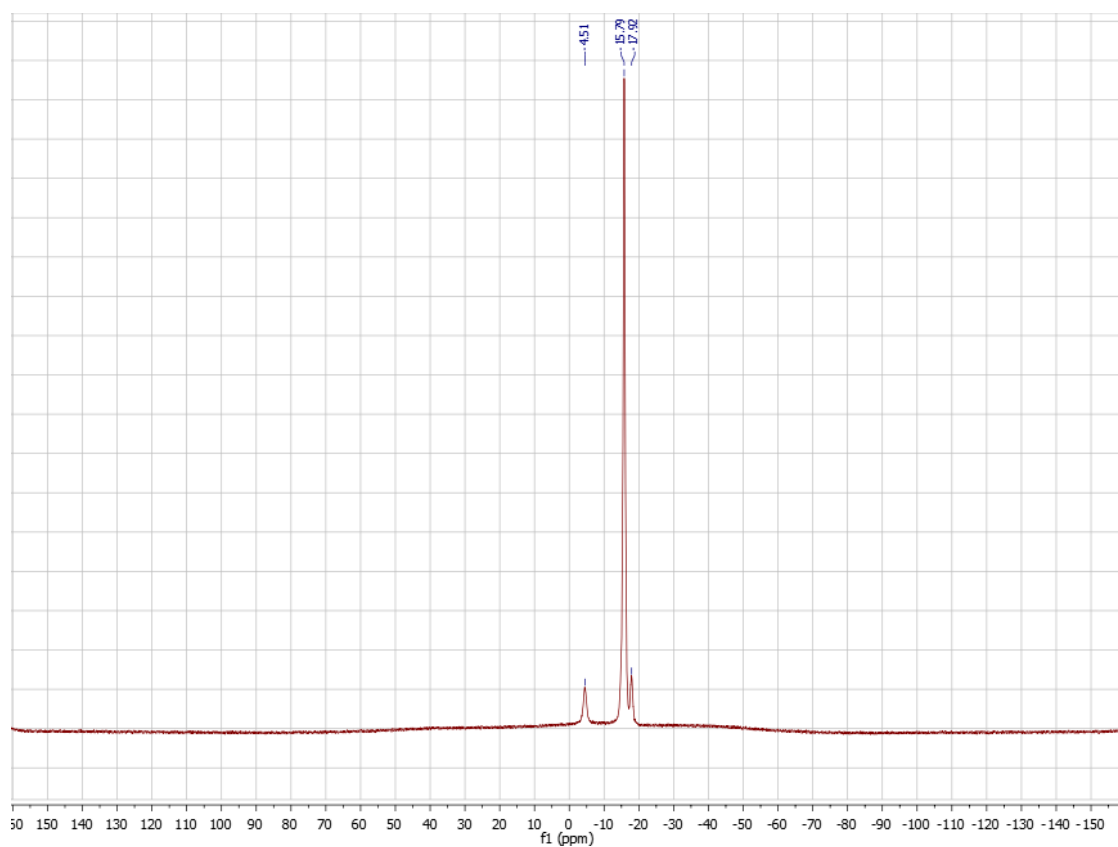

Figure S6:  $^1\text{H}$  NMR spectrum  $(\text{Bu}_4\text{N})[\text{B}_{12}\text{H}_{11}\text{NH}_2\text{CH}_2\text{CH}_2\text{CH}_3]$  2b

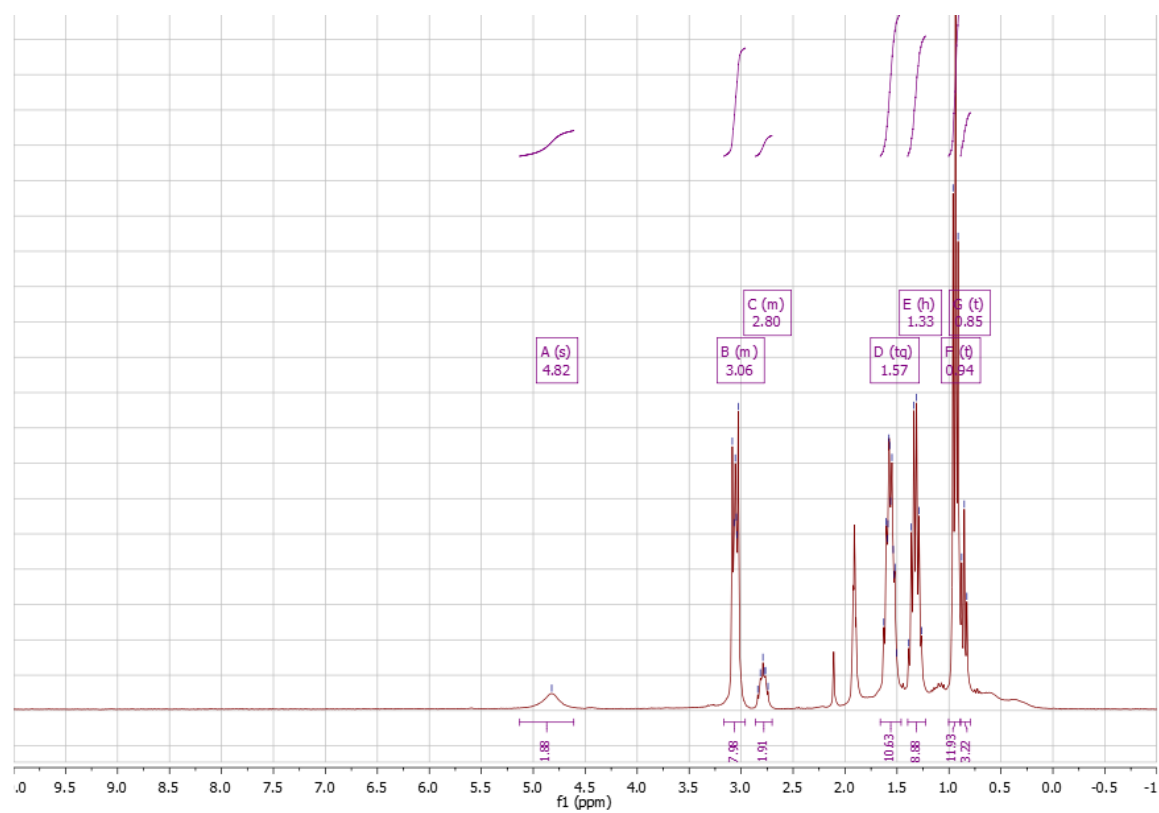

Figure S7:  $^{13}\text{C}$  NMR spectrum  $(\text{Bu}_4\text{N})[\text{B}_{12}\text{H}_{11}\text{NH}_2\text{CH}_2\text{CH}_2\text{CH}_3]$  2b

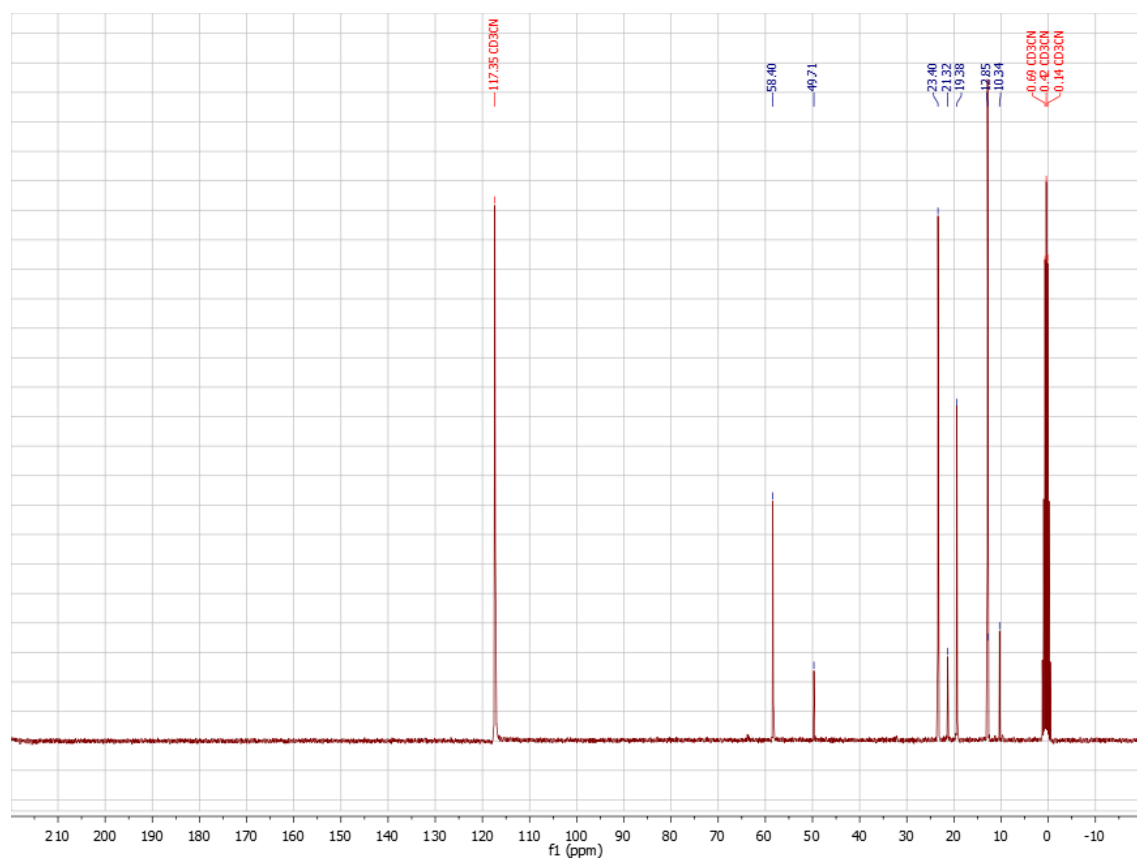

Figure S8: ESI-MS spectrum  $(\text{Bu}_4\text{N})[\text{B}_{12}\text{H}_{11}\text{NH}_2\text{CH}_2\text{CH}_2\text{CH}_3]$  2b (negative area).

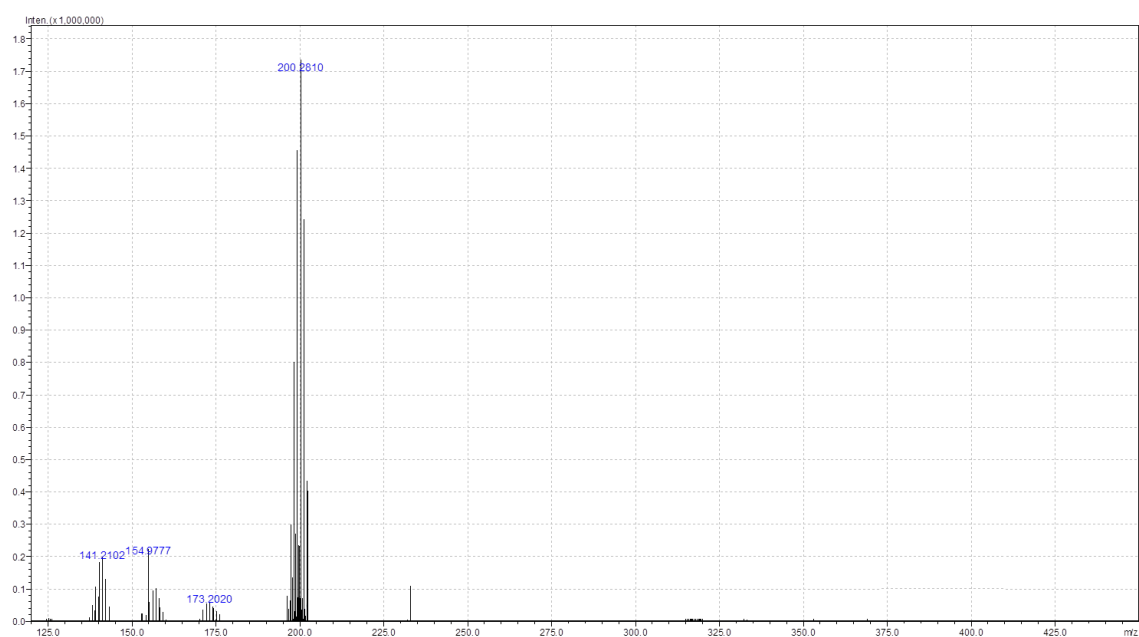

Figure S9:  $^{11}\text{B}\{^1\text{H}\}$  NMR spectrum  $(\text{Bu}_4\text{N})[\text{B}_{12}\text{H}_{11}\text{NH}_2\text{CH}_2\text{CH}_2\text{CH}_2\text{CH}_3]$  2c

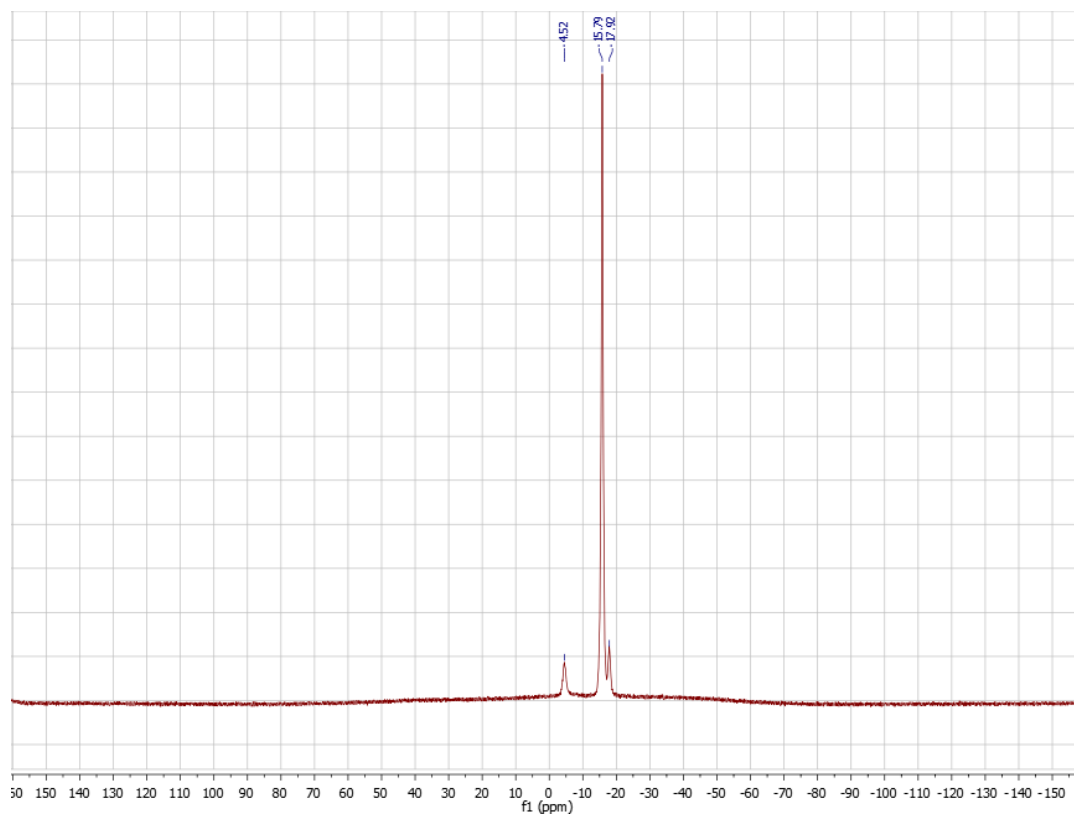

Figure S10:  $^1\text{H}$  NMR spectrum  $(\text{Bu}_4\text{N})[\text{B}_{12}\text{H}_{11}\text{NH}_2\text{CH}_2\text{CH}_2\text{CH}_2\text{CH}_3]$  2c

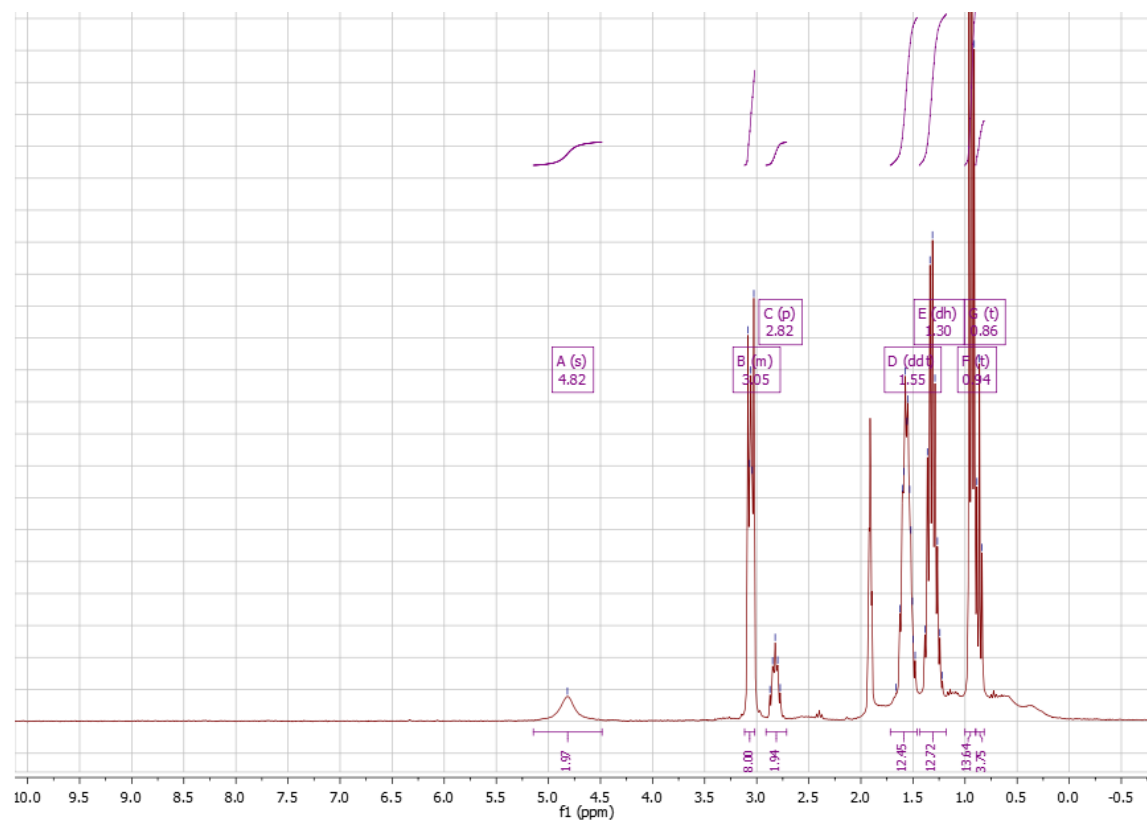

Figure S11:  $^{13}\text{C}$  NMR spectrum  $(\text{Bu}_4\text{N})[\text{B}_{12}\text{H}_{11}\text{NH}_2\text{CH}_2\text{CH}_2\text{CH}_2\text{CH}_3] 2\text{c}$

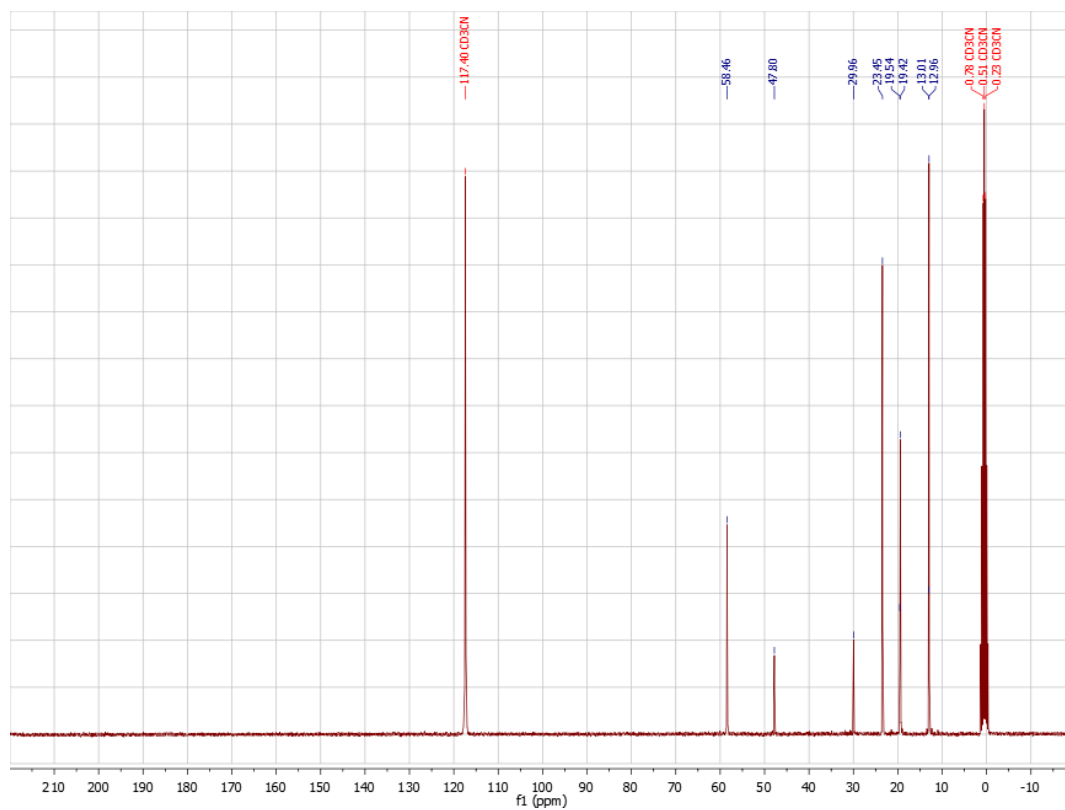

Figure S12: ESI-MS spectrum  $(\text{Bu}_4\text{N})[\text{B}_{12}\text{H}_{11}\text{NH}_2\text{CH}_2\text{CH}_2\text{CH}_2\text{CH}_3] 2\text{c}$  (negative area).

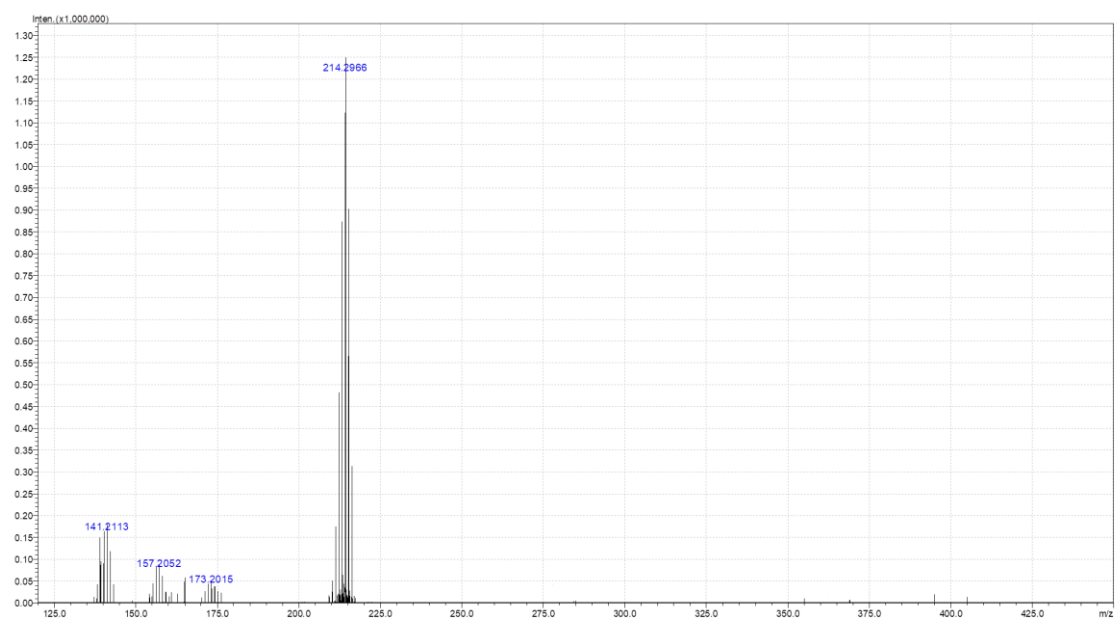

Figure S13:  $^{11}\text{B}\{^1\text{H}\}$  NMR spectrum  $(\text{Bu}_4\text{N})[\text{B}_{12}\text{H}_{11}\text{NH}_2\text{CH}_2\text{CH}(\text{CH}_3)_2]$  2d

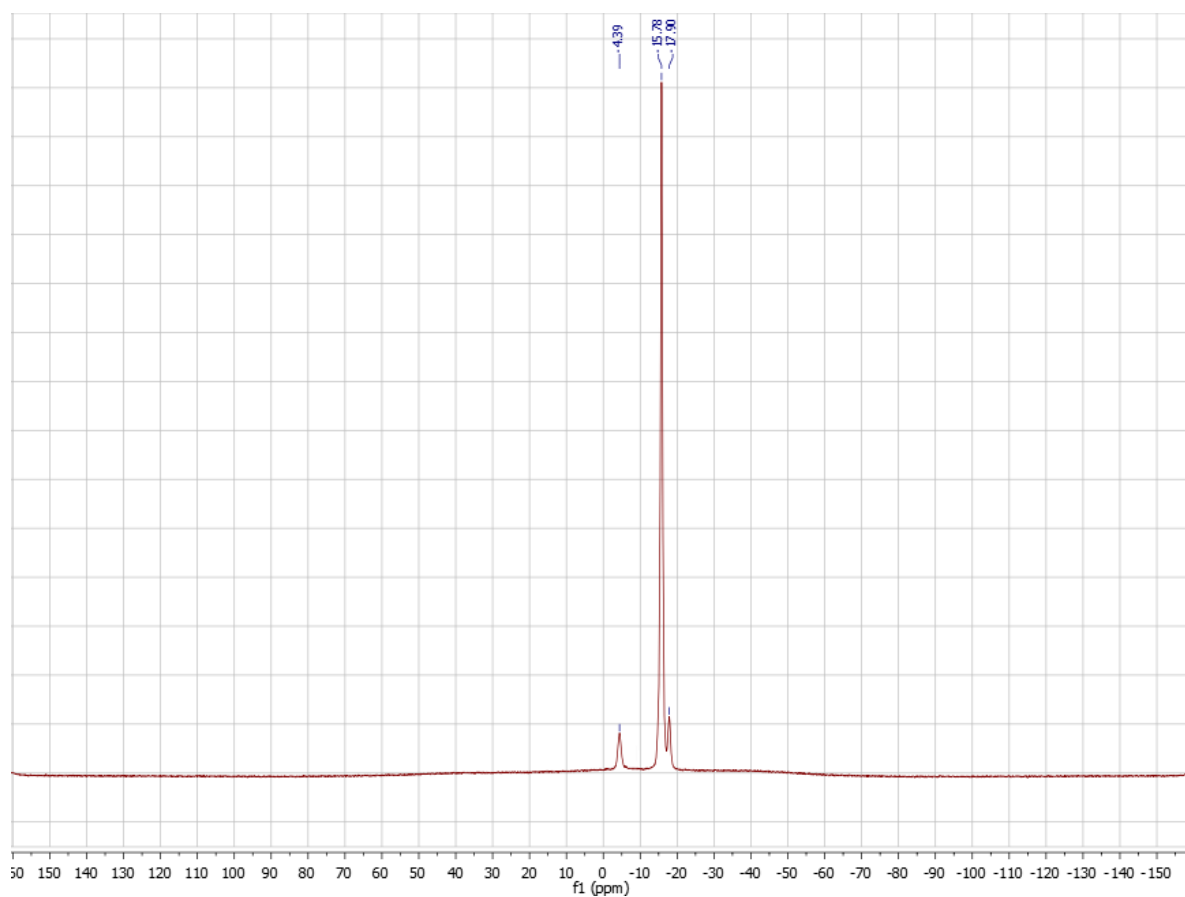

Figure S14:  $^1\text{H}$  NMR spectrum  $(\text{Bu}_4\text{N})[\text{B}_{12}\text{H}_{11}\text{NH}_2\text{CH}_2\text{CH}(\text{CH}_3)_2]$  2d

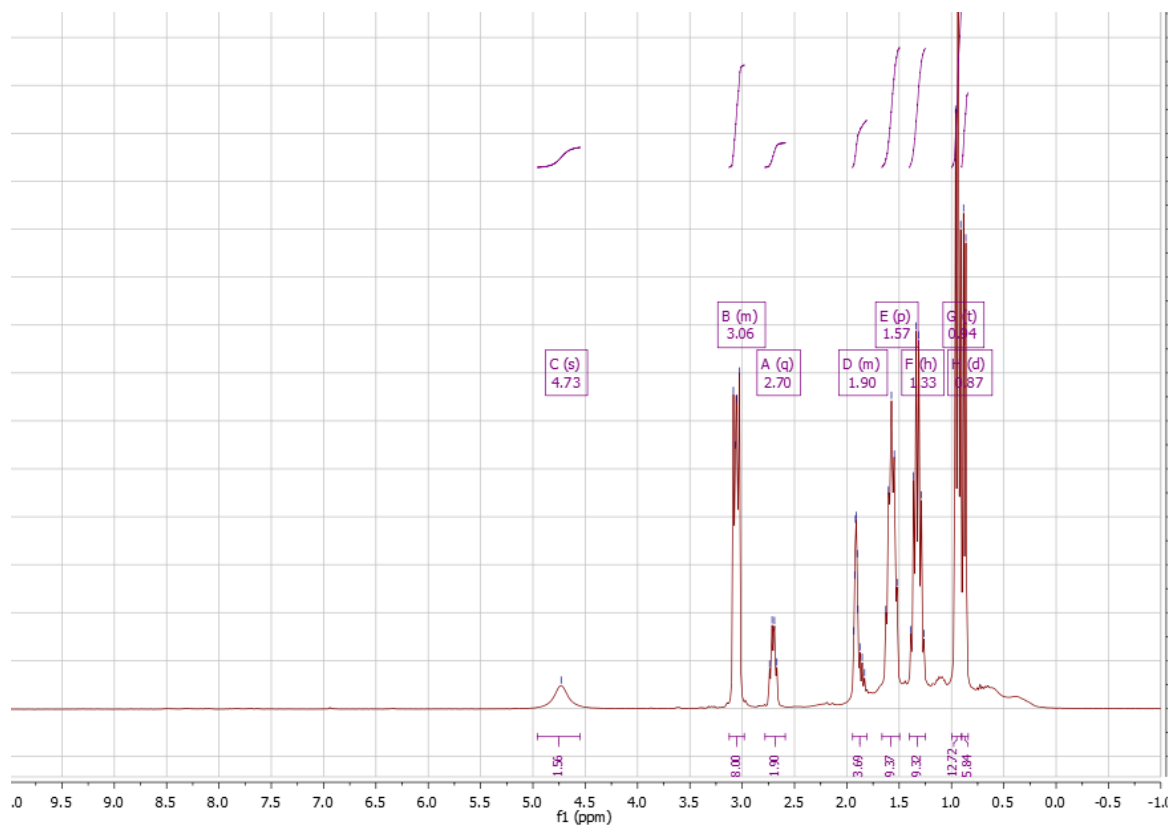



Figure S15:  $^{13}\text{C}$  NMR spectrum  $(\text{Bu}_4\text{N})[\text{B}_{12}\text{H}_{11}\text{NH}_2\text{CH}_2\text{CH}(\text{CH}_3)_2]$  2d

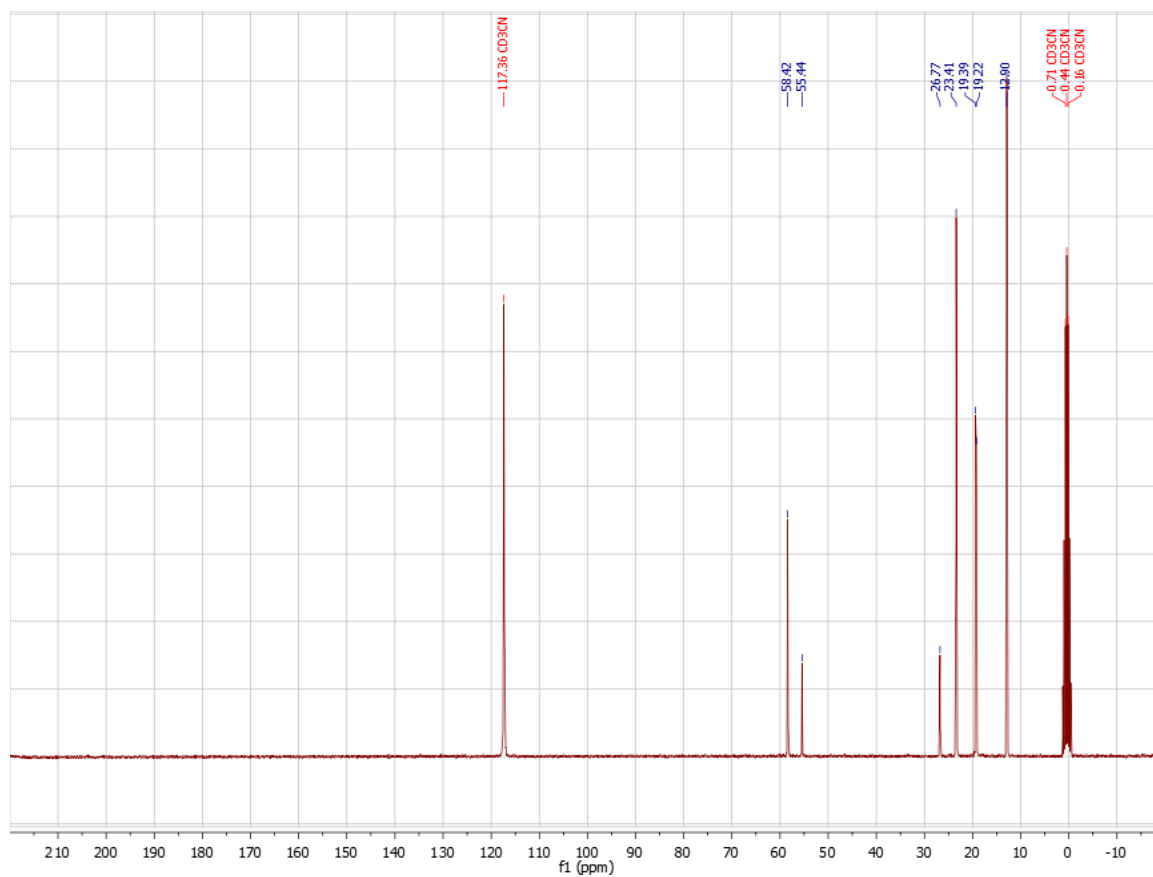

Figure S16: ESI-MS spectrum  $(\text{Bu}_4\text{N})[\text{B}_{12}\text{H}_{11}\text{NH}_2\text{CH}_2\text{CH}(\text{CH}_3)_2]$  2d (negative area).

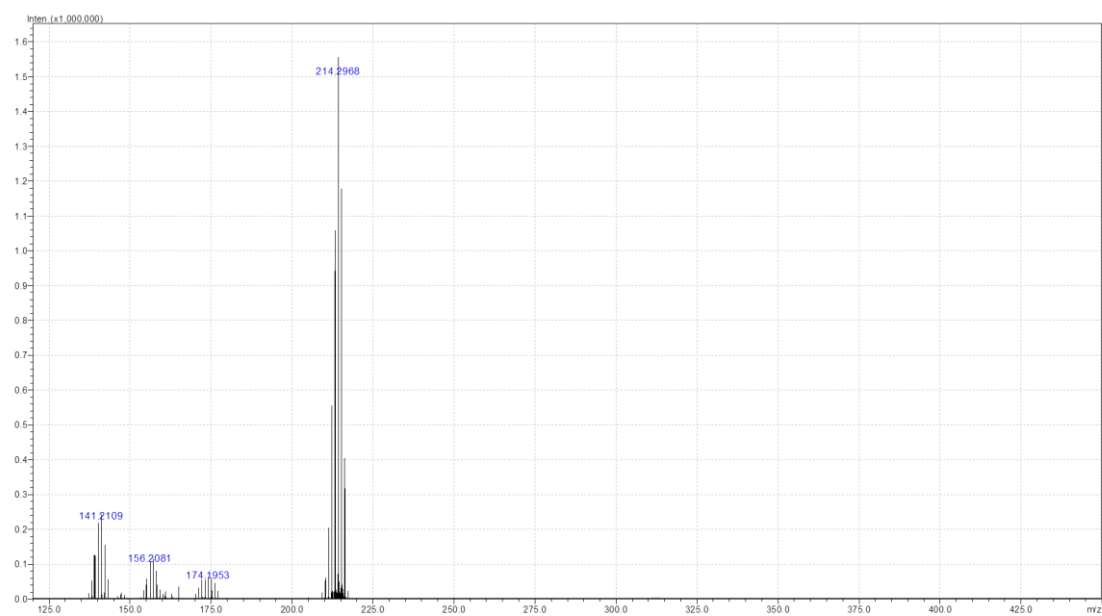

Figure S17:  $^{11}\text{B}\{^1\text{H}\}$  NMR spectrum  $(\text{Bu}_4\text{N})[\text{B}_{12}\text{H}_{11}\text{NH}_2\text{CH}_2\text{C}_6\text{H}_4\text{CH}_3] 2\text{e}$

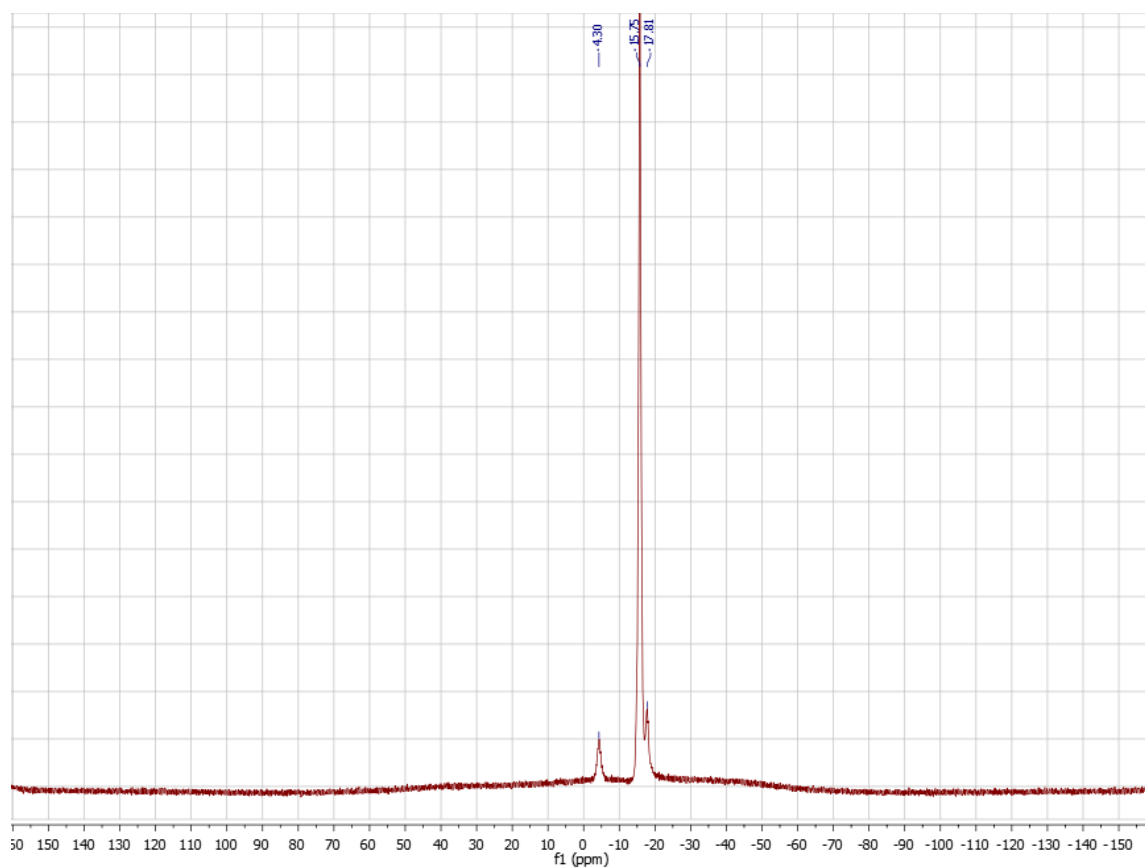

Figure S18:  $^1\text{H}$  NMR spectrum  $(\text{Bu}_4\text{N})[\text{B}_{12}\text{H}_{11}\text{NH}_2\text{CH}_2\text{C}_6\text{H}_4\text{CH}_3] 2\text{e}$

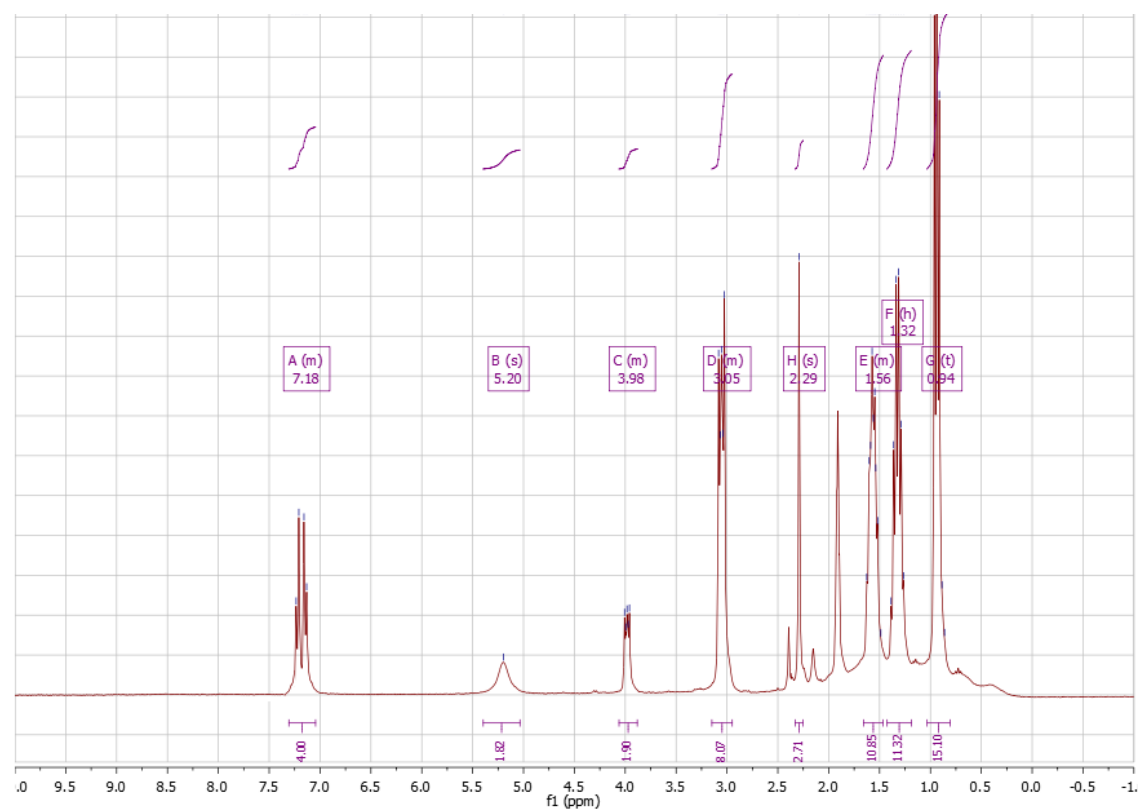

Figure S19:  $^{13}\text{C}$  NMR spectrum  $(\text{Bu}_4\text{N})[\text{B}_{12}\text{H}_{11}\text{NH}_2\text{CH}_2\text{C}_6\text{H}_4\text{CH}_3]$  2e

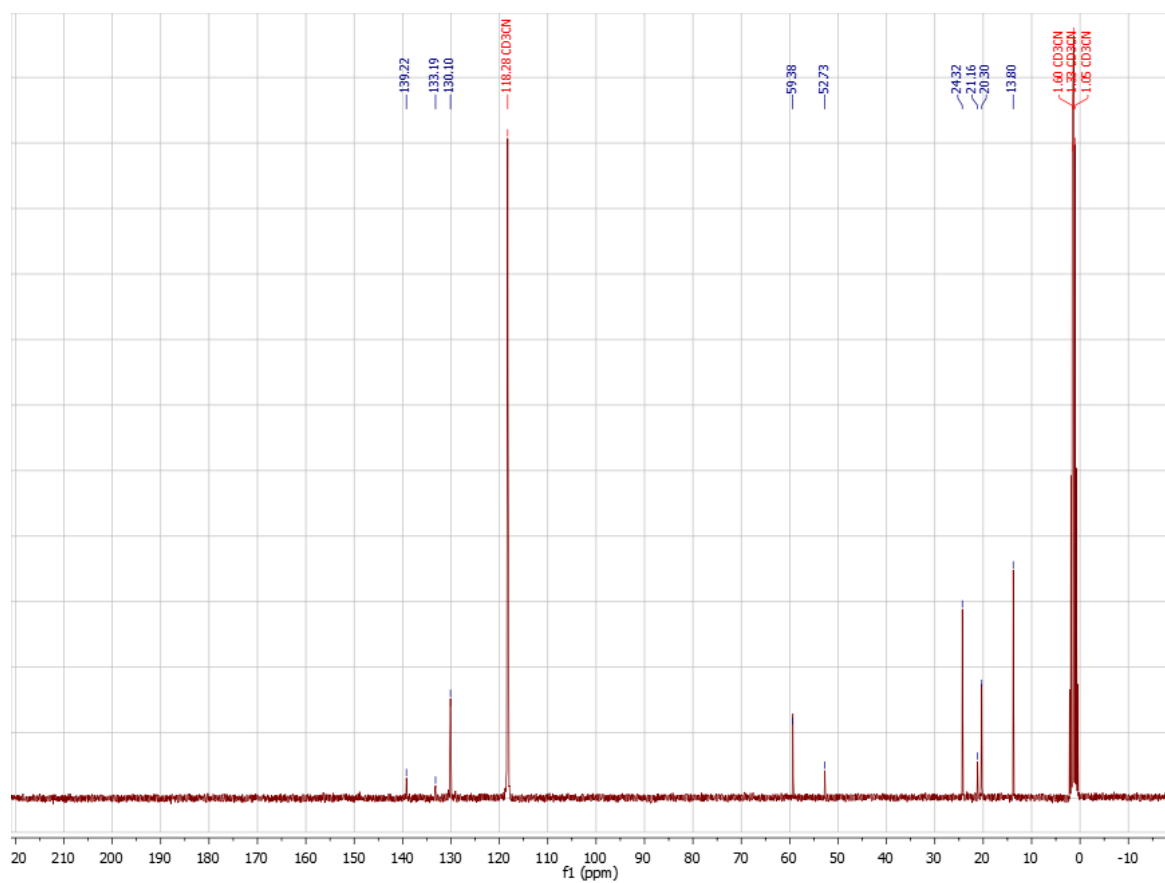

Figure S20: ESI-MS spectrum  $(\text{Bu}_4\text{N})[\text{B}_{12}\text{H}_{11}\text{NH}_2\text{CH}_2\text{C}_6\text{H}_4\text{CH}_3]$  2e (negative area).

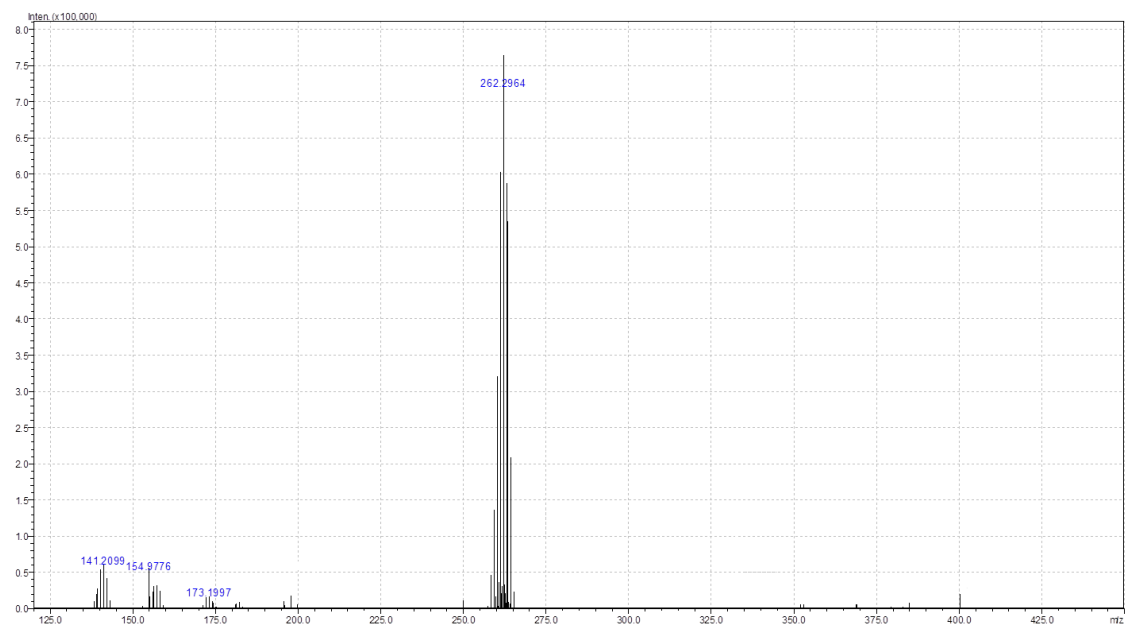

**Figure S21:** Molecular graph showing the results of the topological analysis of the electron density distribution in the model structure of the trimer of  $[\text{B}_{12}\text{H}_{11}\text{NH}_2\text{CH}_2\text{CH}_3]^-$ .

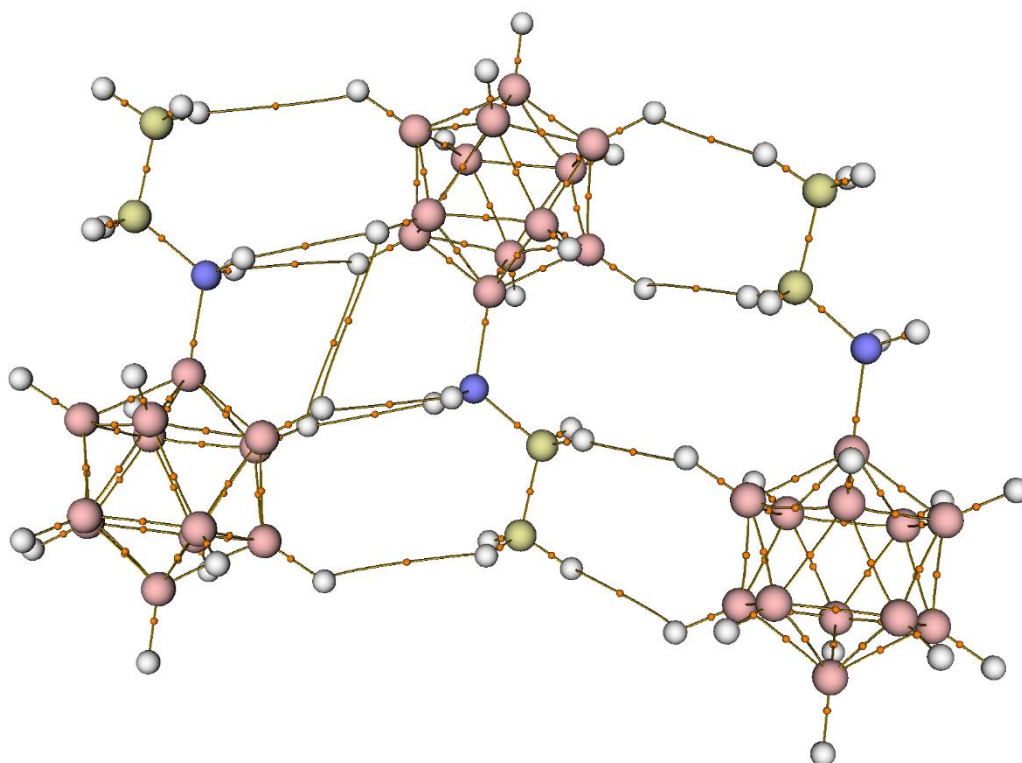

**Table S1.** Cartesian atomic coordinates of the calculated structure of  $[\text{B}_{12}\text{H}_{11}\text{NH}_2\text{Et}]^-$  trimer.

|   | x        | y        | z        |
|---|----------|----------|----------|
| N | 2.994833 | 6.460332 | 9.881283 |
| H | 3.188835 | 7.229974 | 10.3263  |
| H | 3.693763 | 6.293056 | 9.32291  |
| C | 1.845291 | 6.712234 | 9.0666   |
| H | 1.135773 | 7.093647 | 9.643411 |
| H | 1.512406 | 5.845363 | 8.724674 |
| C | 2.040783 | 7.624363 | 7.908723 |
| H | 2.642937 | 7.20384  | 7.260049 |
| H | 2.432353 | 8.467533 | 8.218973 |
| H | 1.175896 | 7.803011 | 7.48363  |
| B | 2.949834 | 5.289054 | 10.95148 |
| B | 4.389147 | 4.29671  | 11.15693 |
| H | 5.325994 | 4.46951  | 10.56832 |
| B | 3.876315 | 5.424903 | 12.44718 |
| H | 4.47612  | 6.335674 | 12.70362 |
| B | 2.088457 | 5.437841 | 12.49983 |
| H | 1.507744 | 6.352713 | 12.78565 |
| B | 1.51026  | 4.300591 | 11.2388  |
| H | 0.543468 | 4.473042 | 10.70117 |
| B | 2.930702 | 3.59547  | 10.39661 |

|   |          |          |          |
|---|----------|----------|----------|
| H | 2.904863 | 3.309696 | 9.314164 |
| B | 4.428939 | 3.784365 | 12.86172 |
| H | 5.395793 | 3.607114 | 13.39916 |
| B | 3.016744 | 4.494661 | 13.69854 |
| H | 3.050781 | 4.786892 | 14.77916 |
| B | 1.544885 | 3.796009 | 12.95198 |
| H | 0.610114 | 3.626599 | 13.54564 |
| B | 2.06601  | 2.669109 | 11.63873 |
| H | 1.466629 | 1.761509 | 11.36978 |
| B | 3.840455 | 2.653584 | 11.59919 |
| H | 4.414743 | 1.736461 | 11.31041 |
| B | 2.996534 | 2.784258 | 13.16258 |
| H | 3.014201 | 1.944931 | 13.9034  |
| N | -3.05109 | 6.477668 | 11.60864 |
| H | -3.2451  | 5.708026 | 11.16363 |
| H | -3.75002 | 6.644944 | 12.16702 |
| C | -1.90155 | 6.225766 | 12.42333 |
| H | -1.19203 | 5.844353 | 11.84652 |
| H | -1.56867 | 7.092637 | 12.76525 |
| C | -2.09704 | 5.313637 | 13.5812  |
| H | -2.6992  | 5.73416  | 14.22988 |
| H | -2.48861 | 4.470467 | 13.27095 |
| H | -1.23216 | 5.134989 | 14.0063  |
| B | -3.00609 | 7.648946 | 10.53845 |
| B | -4.44541 | 8.64129  | 10.333   |
| H | -5.38225 | 8.46849  | 10.92161 |
| B | -3.93258 | 7.513097 | 9.042746 |
| H | -4.53238 | 6.602326 | 8.786307 |
| B | -2.14472 | 7.500159 | 8.990096 |
| H | -1.56401 | 6.585287 | 8.70428  |
| B | -1.56652 | 8.637409 | 10.25113 |
| H | -0.59973 | 8.464958 | 10.78876 |
| B | -2.98696 | 9.34253  | 11.09332 |
| H | -2.96112 | 9.628304 | 12.17576 |
| B | -4.4852  | 9.153635 | 8.628205 |
| H | -5.45205 | 9.330886 | 8.090764 |
| B | -3.07301 | 8.443339 | 7.791388 |
| H | -3.10704 | 8.151108 | 6.710767 |
| B | -1.60115 | 9.141991 | 8.537948 |
| H | -0.66637 | 9.311401 | 7.944289 |
| B | -2.12227 | 10.26889 | 9.851197 |
| H | -1.52289 | 11.17649 | 10.12014 |
| B | -3.89672 | 10.28442 | 9.890739 |
| H | -4.471   | 11.20154 | 10.17952 |
| B | -3.0528  | 10.15374 | 8.327346 |
| H | -3.07046 | 10.99307 | 7.586524 |

|   |          |          |          |
|---|----------|----------|----------|
| N | 7.240907 | 6.477668 | 11.60864 |
| H | 7.046904 | 5.708026 | 11.16363 |
| H | 6.541976 | 6.644944 | 12.16702 |
| C | 8.390449 | 6.225766 | 12.42333 |
| H | 9.099966 | 5.844353 | 11.84652 |
| H | 8.723333 | 7.092637 | 12.76525 |
| C | 8.194957 | 5.313637 | 13.5812  |
| H | 7.592803 | 5.73416  | 14.22988 |
| H | 7.803387 | 4.470467 | 13.27095 |
| H | 9.059844 | 5.134989 | 14.0063  |
| B | 7.285906 | 7.648946 | 10.53845 |
| B | 5.846593 | 8.64129  | 10.333   |
| H | 4.909746 | 8.46849  | 10.92161 |
| B | 6.359424 | 7.513097 | 9.042746 |
| H | 5.759619 | 6.602326 | 8.786307 |
| B | 8.147283 | 7.500159 | 8.990096 |
| H | 8.727995 | 6.585287 | 8.70428  |
| B | 8.725479 | 8.637409 | 10.25113 |
| H | 9.692271 | 8.464958 | 10.78876 |
| B | 7.305037 | 9.34253  | 11.09332 |
| H | 7.330877 | 9.628304 | 12.17576 |
| B | 5.8068   | 9.153635 | 8.628205 |
| H | 4.839946 | 9.330886 | 8.090764 |
| B | 7.218995 | 8.443339 | 7.791388 |
| H | 7.184958 | 8.151108 | 6.710767 |
| B | 8.690855 | 9.141991 | 8.537948 |
| H | 9.625626 | 9.311401 | 7.944289 |
| B | 8.169729 | 10.26889 | 9.851197 |
| H | 8.76911  | 11.17649 | 10.12014 |
| B | 6.395285 | 10.28442 | 9.890739 |
| H | 5.820997 | 11.20154 | 10.17952 |
| B | 7.239205 | 10.15374 | 8.327346 |
| H | 7.221538 | 10.99307 | 7.586524 |
